# Supplementary material for: Function of Soybean miR159 Family Members in Plant Responses to Low Phosphorus, High Salinity, and Abscisic Acid Treatment
Source: MDPI journal article supplement (doi:10.3390/agronomy13071798), 2023-07-05
Supplement: s1 [file s1]

## Supplemental Information

The Supplemental Material for this article can be found online at:

**Supplemental Table S1.** Predicted miR159 target genes in soybean

| miRNA      | Target gene            |                        |                        |                        |
|------------|------------------------|------------------------|------------------------|------------------------|
| miR159a    | <i>Glyma.06g134200</i> | <i>Glyma.05g169200</i> | <i>Glyma.18g014400</i> | <i>Glyma.09g053400</i> |
|            | <i>Glyma.02g205700</i> | <i>Glyma.17g094800</i> | <i>Glyma.03g045700</i> | <i>Glyma.14g220600</i> |
|            | <i>Glyma.17g259500</i> | <i>Glyma.15g231300</i> | <i>Glyma.15g231100</i> | <i>Glyma.15g230900</i> |
|            | <i>Glyma.15g233100</i> | <i>Glyma.20g248200</i> | <i>Glyma.18g265900</i> | <i>Glyma.15g233400</i> |
| miR159b    | <i>Glyma.09g202900</i> | <i>Glyma.18g062700</i> | <i>Glyma.02g220200</i> | <i>Glyma.14g187600</i> |
|            | <i>Glyma.11g200800</i> |                        |                        |                        |
| miR159c    | <i>Glyma.20g047600</i> | <i>Glyma.13g073400</i> | <i>Glyma.15g225300</i> | <i>Glyma.13g187500</i> |
|            | <i>Glyma.19g206100</i> | <i>Glyma.06g312900</i> | <i>Glyma.04g125700</i> | <i>Glyma.16g029800</i> |
|            | <i>Glyma.19g121000</i> | <i>Glyma.16g144200</i> | <i>Glyma.13g031500</i> | <i>Glyma.14g154200</i> |
|            | <i>Glyma.03g099000</i> | <i>Glyma.03g005000</i> | <i>Glyma.04g161400</i> | <i>Glyma.05g022800</i> |
|            | <i>Glyma.06g204300</i> | <i>Glyma.06g096000</i> | <i>Glyma.07g061200</i> | <i>Glyma.03g187400</i> |
|            | <i>Glyma.08g032100</i> | <i>Glyma.15g181500</i> | <i>Glyma.16g145300</i> | <i>Glyma.07g061100</i> |
| miR159d    | <i>Glyma.02g086800</i> | <i>Glyma.16g214900</i> | <i>Glyma.U035700</i>   | <i>Glyma.16g214600</i> |
|            | <i>Glyma.16g215000</i> |                        |                        |                        |
| miR159e-3p | <i>Glyma.12g032600</i> | <i>Glyma.06g312900</i> | <i>Glyma.04g125700</i> | <i>Glyma.03g115400</i> |
|            | <i>Glyma.04g100900</i> | <i>Glyma.20g047600</i> | <i>Glyma.13g073400</i> | <i>Glyma.15g079800</i> |
|            | <i>Glyma.15g225300</i> | <i>Glyma.13g187500</i> | <i>Glyma.13g271900</i> | <i>Glyma.12g228100</i> |
|            | <i>Glyma.14g107600</i> | <i>Glyma.12g217800</i> | <i>Glyma.13g282800</i> | <i>Glyma.20g211100</i> |
|            | <i>Glyma.02g061200</i> | <i>Glyma.20g149200</i> | <i>Glyma.18g277700</i> | <i>Glyma.08g240200</i> |
|            | <i>Glyma.03g222300</i> | <i>Glyma.19g219500</i> | <i>Glyma.11g107600</i> | <i>Glyma.14g125900</i> |
|            | <i>Glyma.14g125600</i> | <i>Glyma.15g271900</i> | <i>Glyma.08g030100</i> | <i>Glyma.08g152500</i> |
| miR159e-5p | <i>Glyma.20g211800</i> |                        |                        |                        |
|            | <i>Glyma.06g134200</i> | <i>Glyma.18g014400</i> | <i>Glyma.09g053400</i> | <i>Glyma.05g169200</i> |
|            | <i>Glyma.03g045700</i> | <i>Glyma.14g220600</i> | <i>Glyma.17g259500</i> | <i>Glyma.15g231300</i> |
|            | <i>Glyma.15g231100</i> | <i>Glyma.15g230900</i> | <i>Glyma.15g233400</i> | <i>Glyma.18g265900</i> |
| miR159f    | <i>Glyma.20g248200</i> | <i>Glyma.02g205700</i> | <i>Glyma.17g094800</i> |                        |
|            | <i>Glyma.09g202900</i> | <i>Glyma.18g062700</i> | <i>Glyma.02g220200</i> | <i>Glyma.14g187600</i> |
|            | <i>Glyma.11g200800</i> |                        |                        |                        |

Note: Target genes were predicted using the psRNA Target website (<http://psrna.target.org>). Genes with a score of  $\leq 3.0$  were selected.

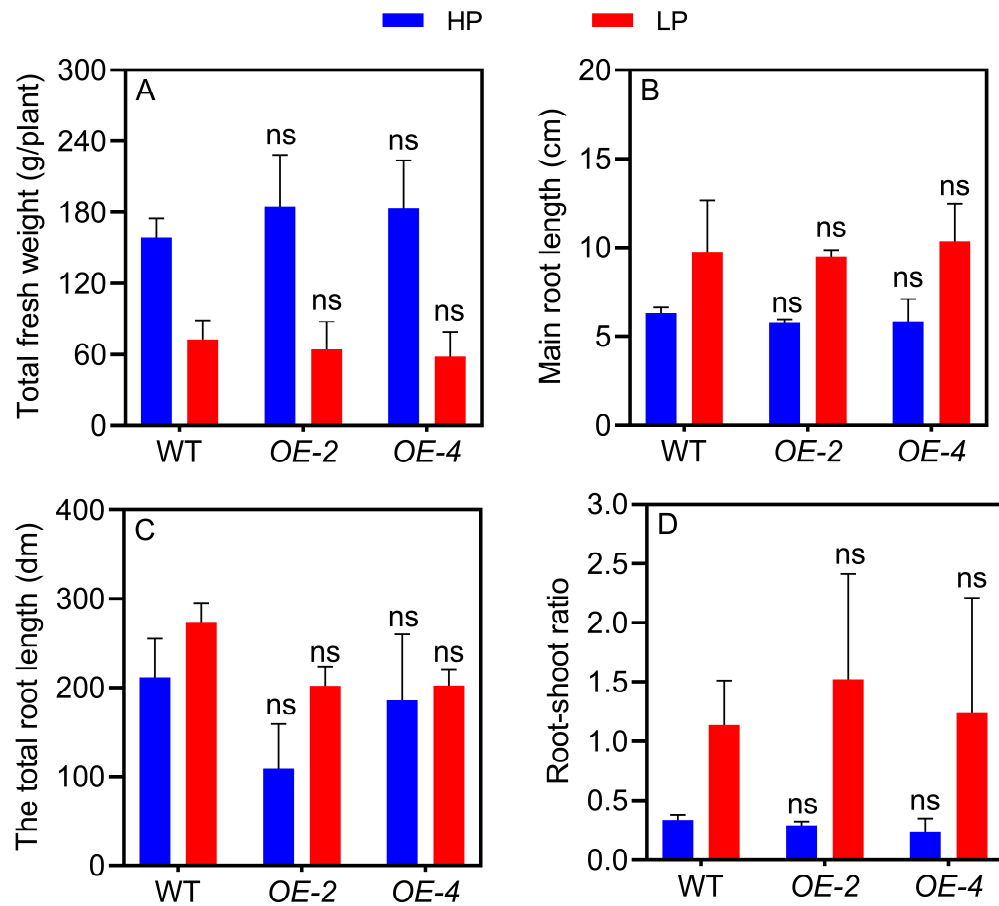

**Supplemental Figure S1.** Effects of *MIR159e* over expression on growth and development. WT, wild type (YC03-3); OE-2, *miR159eOE-2*; OE-4, *miR159eOE-4*; HP, plants treated with a high phosphorus concentration of 250  $\mu$ M; LP, plants treated with a low-P concentration of 5  $\mu$ M; treatment time was 40 days. Results are means  $\pm$  SE from three independent experiments. Student's *t*-test was used to compare the differences between Col-0 and transgenic *MIR159eOE* plants (ns, no significance).

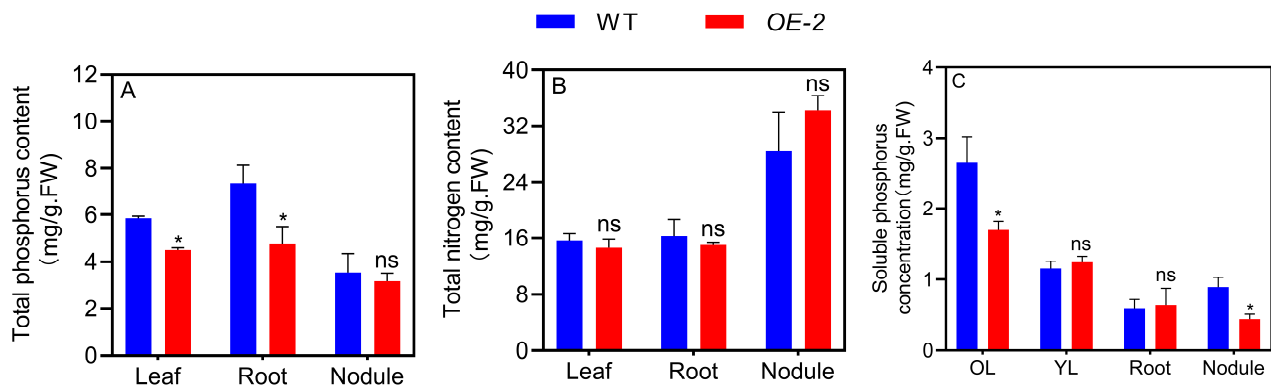

**Supplemental Figure S2.** Total phosphorus, nitrogen, and soluble phosphorus contents in soybean overexpressing *MIR159e* under low-nitrogen conditions. WT, wild type (YC03-3); HPLN, high phosphorus and low nitrogen; treatment was performed for 40 days. Results are means  $\pm$  SE from three independent experiments. Student's *t*-test was used to compare the differences between Col-0 and the transgenic line *MIR159eOE* in the same plant part sampled at the same time point (ns, no significance; \*, P < 0.05).



**Supplemental Table S2.** List of primer pairs used in this study

| Name of primer | Forward Primer (5'-3')       | Reverse Primer (5'-3')        |
|----------------|------------------------------|-------------------------------|
| Gma-miR159a    | AATTAAAGGGGATTATGAAGTGGA     | AGAAAAGAAGAGAAGGGTGTAGAG      |
| Gma-miR159b    | TGCTAGTTCATGGATACCTCTG       | TCCCTTCACTCCAATACCAAA         |
| Gma-miR159c    | ACCCAAGTTGGAGCTCTCT          | AAGGCCTAATTTCGGAGCTC          |
| Gma-miR159d    | GGGTGAATTGAGCTGCTTAG         | AGGCAAATGAAGCTCCCC            |
| Gma-miR159e    | CAAAGGGGGTTATGGAGTGG         | ACAAAAGGGGAGAAGGGTG           |
| Gma-miR159f    | ACCCTCTGGAGCTCCCTT           | TGAAGCTGTGATTATACCGA          |
| GmEF1 $\alpha$ | TGCAAAGGAGGCTGCTAACT         | CAGCATCACCGTTCTTCAA           |
| Gma-miR159e.ox | AAcccgggTAGCAAGGGTTTAGGTGGTG | AAtctagaAGAGCAAGAACGAGATTATGG |

Note: Lowercase letters indicate different *MIR159* gene family members.
